# Supplementary material
Source: MDPI journal article supplement (https://www.mdpi.com/2075-471X/5/1/4)
Supplement: s1 [file s1]

Supplementary Materials: Australia’s National Anti-Bullying Jurisdiction:
Paper Tiger or Velvet Glove

Allison Ballard and Patricia Easteal

**Table S1.** Fair Work Commission 1 January—30 June 2014 Anti-Bullying Applications Under Section 789FC.

| **No** | **Case** | **AB No** | **App Date** | **Dec Date** | **Jn *** | **Heard By *** | **App Gender/Name** | **Legal Rep** | **Respondent** | **Legal Rep** | **Date of Response** | **Conf/Hearing Date** | **No of Bullies** | **Outcome** | **Comment** |
| --- | --- | --- | --- | --- | --- | --- | --- | --- | --- | --- | --- | --- | --- | --- | --- |
| 1 | [2014] FWC 1021 | 1016 | 12/1/14 | 12/2/14 | 1 | 1 | **PC** | N | Unknown | N | N/A | N/A | Unknown | Dismissed under s587(1)(a): Not made in accordance with Act | Application not accompanied by filing fee. Advised 16/1/14 needed to pay fee or provide waiver form. FWC telephone FC on 22/1/14 about above and possible dismissal if same not forthcoming but no fee/waiver form provided. |
| 2 | [2014] FWC1098 | 1019 | 16/1/14 | 14/2/14 | 1 | 1 | **ZB** | N | Unknown | N | N/A | N/A | Unknown | Dismissed under s587(1)(a): Not made in accordance with Act | Application not accompanied by fee. ZB advised by phone and then letter on 16/1/14 of need for fee or waiver form if they wished application to proceed, FWC again wrote on 23/1/14 but no further response from ZB |
| 3 | [2014] FWC 1395 | 1009 | Not known | 24/3/14 | 1 | 1 | F **Kathleen MCINNES** | Y | Peninsula Support Services Inc. | Y (in-house counsel) | Not known | Hearing 20/2/14 Melbourne | Unknown | Dismissed  FB found McInnes could rely on alleged conduct that took place before the commencement of the AB provisions | Related Full Bench matter **[2014] FWCFB 1440** –Respondent raised a number of jurisdictional objections: whether constitutionally-covered workplace; whether constitutional corporation; whether **trading corporation**—community services organisation: nature of funding and activities considered—distinction between government funding for contract services and grant funding to support programs—funded activities lack trading character -trading activities insignificant, peripheral and incidental. FWC held **not a trading corporation so no jurisdiction**—application dismissed. |
| 4 | [2014] FWC1416 | 1047 | 5/2/14 | 5/3/14 | 1 | 1 | M **AO** | N | Unknown | N | N/A | N/A | Unknown | Dismissed under s587(1)(a): Not made in accordance with Act | No filing fee, AO advised 6/2/14 that fee waiver application refused and he needed to pay, on 12/2/14 told app may be dismissed if no payment within 14/7. Nothing more heard from AO. |
| 5 | [2014] FWC1427 | 1042 | 30/1/14 | 3/3/2014 | 1 | 1 | M **TK** | N | Unknown | N | N/A | N/A | Unknown | Dismissed under s587(1)(a): Not made in accordance with Act | No filing fee, TK advised 31/1/14 and later letter that he needed to pay or apply for waiver if he did not want app dismissed. FWC again wrote to TK on 10/2/14 but no further response from TK |
| 6 | [2014] FWC1741 | 1051 | 7/2/14 | 14/3/14 | 1 | 1 | **CD** | N | Unknown | N | N/A | N/A | Unknown | Dismissed under s587(1)(a): Not made in accordance with Act | No filing fee with application. 11/2/14 and 18/2/14 FWC advised app of need for same but no further response from app. |

**Table S1.** *Cont.*

|  | **Case** | **AB No** | **App Date** | **Dec Date** | **Jn*** | **Heard By*** | **App Gender/Name** | **Legal Rep** | **Respondent** | **Leg Rep** | **Date of Response** | **Conf/Hearing Date** | **No of Bullies** | **Outcome** | **Comment** |
| --- | --- | --- | --- | --- | --- | --- | --- | --- | --- | --- | --- | --- | --- | --- | --- |
| 7 | [2014] FWC2076  (replaced doc. issued 2/4/14 with same code | 1061 | 12/2/14 | 2/4/14 | 2 | 2 | M **Arnold Balthazaar** | N | Dept Human Services (Cth) | Y  (in-house) | 24/2/14 | On the papers | A number of Centrelink staff members | Dismissed: not a valid application as applicant **not a worker f**or the purposes of s789FC | Application for an FWC order to stop bullying—whether person covered by legislation -definition of worker—definition of volunteer—definition of outworker—person in receipt of carer payments under social security legislation not a person performing work for the Department of Human Services—Fair Work Act 2009 ss.789FC, 789FD—Work Health and Safety Act 2011 ss. 4,7, 11,12—Social Security  Act 1991 s.198. |
| 8 | [2014] FWC2104 | 1035 | - | 2/5/14 | 1 | 1 | F **SB** | N | Unknown | Y (employee of REO [3]  D Miller & R Soh of AIG | Unknown | Hearing Melbourne 1/4//14  Conciliation 22/4/14 concluding 5/5/14 | Junior staff | Not satisfied that there were repeated incidents of unreasonable behaviour which were not RMA* carried out in a RM*. I therefore cannot make orders in this matter [100-101]. | Manager alleging employees supervised were bullying as a result of them making bullying allegations against her and other unreasonable conduct—alleged lack of management support—whether individuals repeatedly behaving unreasonably so as to create a risk to health and safety—whether application taken simply as a response to bullying allegations being made against applicant—role of external investigation discussed—evidence assessed—some conduct found bordering on unreasonable but not sufficient to meet the statutory definition—no basis to make an order—application dismissed. |
| 9 | [2014] FWC2884 | 1151 | 31/3/14 | 2/5/14 | 1 | 1 | F **CP** | N | Unknown | N | NA | NA | Unknown | Dismissed under s587(1)(a) : Not made in accordance with Act, also (1)(c**) no reasonable prospects of success** | Application fee incomplete and not signed, asked on 31/3/14 to complete, 7/4/214 contact by phone, CP indicated she may not pursue, FWC sent further correspondence but no further response from CP. |
| 10 | [2014] FWC2903 | 1125 | 8/3/14 | 5/5/14 | 1 | 1 | M **DB** | N | Unknown | N | NA | Listed for preliminary proceedings by telephone 15/4/14. DB did not participate and no reasons | Unknown | Dismissed under s587(1)( c**) no reasonable prospects of success** | FWC made several attempts to contact DB after the no-show. Re-listed for 1/5/14. DB did not advance his application or participate in proceedings |
| 11 | [2014] FWC3151 | 1196 | 16/4/14 | 14/5/14 | 1 | 1 | F CM | N | Unknown | N | NA | NA | Unknown | Dismissed under s587(1)(a): Not made in accordance with Act  (no fee) | Not signed and not accompanied by filing fee, sent letter on 17/4/14, 23/4/14 attempted phone and letter. No further response |
| 12 | [2014] FWC3288 | 1135 | Unclear | 2/6/14 | 1 | 1 | F **SW** | N | WA Dept Education | Y (Dept.) | Unknown | Written submissions 29/4/14, 15/5/14  App 14/5/14 | Unknown | FWC will dismiss if SW does not expeditiously discontinue | WA teacher—workplace conducted by WA State govt department under the terms of State legislation—identity of the employer—scope of AB jurisdiction discussed—relevance of national system employer—whether workplace is constitutionally-covered—not conducted by the Commonwealth or in a Territory—whether trading or financial corporation—not a corporation—no jurisdiction—application to be dismissed. |

**Table S1.** *Cont.*

|  | **Case** | **AB No** | **App Date** | **Dec Date** | **Jn *** | **Heard By *** | **App Gender/ Name** | **Legal Rep** | **Respondent** | **Legal Rep** | **Date of Response** | **Conf/Hearing Date** | **No of Bullies** | **Outcome** | **Comment** |
| --- | --- | --- | --- | --- | --- | --- | --- | --- | --- | --- | --- | --- | --- | --- | --- |
| 13 | [2014] FWC3408 | 1091 | Unknown | 26/5/14 | 3 | 3 | M **Mitchell Shaw** | N | ANZ Bank Bianca Haines | D.Natenzon | Unknown | Originally set down for 14-15/5/14. 22/4/14 R applied to have matter dismissed so written subs sought. Hearing 9/5/14 (Melb/Brisb videolink) | Unknown | Order dismissing application made separately in PR550413 | Employee dismissed on 11/4/14 after application lodged; Application to dismiss because application for order to stop bullying has **no reasonable prospect of success [good discussion at [8];** No risk of continued bullying at work; Application to dismiss upheld; Application for order to stop bullying dismissed. Lodged GPA (termination) on 5/5/14. Seems that app accepted dismissal [7]  **Ex tempore decision of earlier decision delivered 9/5/14** Shaw at liberty to make a fresh application if reinstated [17] |
| 14 | [2014] FWC3759 | 1240 | 12/5/14 | 10/6/14 | 1 | 1 | F **SK** | N | Unknown | NA | NA | NA | Unknown | Dismissed under s587(1)(a): Not made in accordance with Act (no fee, not on proper form) | No filing fee with application and not made on prescribed form. 12/5/2014 applicant advised of deficiencies by letter; also on 19/5/14 but no further response from her. |
| 15 | [2014] FWC3761 | 1237 | 9/5/15 | 5/6/14 | 1 | 1 | F **SB** | N | Unknown | NA | NA | NA | Unknown | Dismissed under s587(1)(a): Not made in accordance with Act (no fee not on proper form) | Not on proper form and no fee, advised of same on 9/5/14 by phone and letter. On 16/5/14 FWC contacted SB and she said she was seeking advice from union. FWC again contacted SB but no further response. |
| 16 | [2014] FWC3839 | 1067 | 19/2/14 | 16/6/14 | 4 | 4 | M **Tao Sun** | N | Mr Achemedei of CITIC Pacific Mining Management PL | Mr D Jones, Snr Employee Relations consultant, Chamber of Industry & Commerce (CCIWA) | 6/4/14 denying allegations and claiming RMA in RM | 27/3/14 conf., at end of which FWC made written recommendation & sought responses. App rejected FWC reco. on 31/3/14. Hearing 6/5/14 Perth | 1 manager | First complaint of bullying; alleged management action did not occur. Second complaint, when applying an objective test was not bullying or unreasonable; they were reasonable and carried out in a reasonable manner [71] | Performance appraisal 7/11/13 “meets requirements”. 20/12/13 collapsed at work and taken to hospital in Perth. At meeting on 13/114 app claimed collapse was ‘work related “attack” and he was asked to submit written complaint. App claimed unnamed person changed weightings on his PA leading to a smaller annual bonus than expected. App could not explain how he had accessed the electronic diaries of Ache and Liu. Employer undertook inquiries into Sun’s bullying allegations and found them unsubstantiated {31]. No evidence to support change in original PA. Bonus discretionary |
| 17 | [2014] FWC3852 | 1020 | 16/1/14 | 23/6/14 | 3 | 5 | M **Mr MT** | N | Unknown | No | 22/1/14.  Listed for 14/3/14 but cancelled due termination. | Listed for conf 5/2/14 (union support person and Employee Relations manager | Individuals | Cited Shaw case—change in circumstances, end of employment relationship so dismissed on basis no reasonable prospect [23]. App filed s394 app re dismissal. | On 5/2 Became evident that employer had conduct issues it wished to discuss but hadn’t been able to. To facilitate discussion, FWC made premises available to parties 20/2/14. OP filed chronology 13/2/14. As matter unresolved FWC directed employer to provide matter status update within 7 days. 28/2/14 letter dated 26/2/14 show cause letter. App seeks re-listing on 4/3/14, re-listed 14/3/14. Employer terminated employment 6/3/14, FWC asked app to discontinue. |

**Table S1.** *Cont.*

|  | **Case** | **AB No** | **App Date** | **Dec Date** | **Jn *** | **Heard By *** | **App Gender/ Name** | **Legal Rep** | **Respondent** | **Legal Rep** | **Date of Response** | **Conf/ Hearing Date** | **No of Bullies** | **Outcome** | **Comment** |
| --- | --- | --- | --- | --- | --- | --- | --- | --- | --- | --- | --- | --- | --- | --- | --- |
| 18 | [2014] FWC 3891 | 1117 | Unclear | 12/6/14 | 3 | 6 | HC | Unknown | Unk | UNK | UNK | UNK | UNK | No persuaded that it is in public interest to refer application to FB, nor any other considerations that warrant referral. Consideration by single member appropriate. | App sought a direction under s582 that FB hear matter (directions by the P). President considered all material, transcript before Commissioner Roberts |
| 19 | [2014] FWC3940 | 1056 | Unclear | 17/6/14 | **3** | 7 | F  **The Applicant** | N | General Manager and Company C | Y Ms R Sweet, Mr G Jolly |  | Unsuccessful conciliation & hearing 2/5/14, written subs | 1 (GM)—based in QLD | Considering all of the matters I am not satisfied that there were repeated incidents of unreasonable behaviour which were not reasonable management action carried out in a reasonable manner. I therefore cannot make orders in this matter | App was training manager in Victoria. Changed reporting arrangement. Applicant returns from ANNUAL LEAVE BY 23/9/13. Meeting while app on leave and so Vic trainers felt jobs under threat. Events prior provide  context [10]. Ten witnesses for the Respondent [21]. Claimed app was a bully [39] which FWC did not accept. |
| 20 | [2014] FWC4166 | 1093 | 4/3/14 | 24/6/14 | 4 | 4 | F **Natalie Brenton** | Y Mr J Da Silva, Australian Meat Industry Union | Dynaline Holdings T/A Tiltopro | Mr G Raptis WR Lawyer, Master Grocers Australia | 14/3/2014 | Conference 2/4/14,  re-listed | 2 | Dismissed for WOJ s5783(3)(a**) on its own initiative** As A left employment on 20/6/2014 | Ms B left employment and Respondent advised FWC of same on 23/6/14 |
| 21 | [2014] FWC 4198 | 1169 | 24/6/14 | 24/6/14 | 3 | 8 | M  **The Applicant** | N | Unknown | Y  Ben Tallboys | 17/11/2014  -raised JOs | 28/5/14 conference Mentioning and programming conference by telephone 6/6/14 | CEO and another snr manager, and the CS provider business | **Permission granted for three Respondents to be legally represented** [9]. Applicant objected [10].  Ss596(2)(a) and (b) met | [2014]FWC4198 Appeal pursuant to s604 lodge against this decision: refer [2014]FWCFB 4297.  Applicant medical practitioner to a health and community services provider in regional Victoria.  Independent mediation conducted. First conference concluded on basis parties would further discuss revised work hours/working arrangements (which didn’t result in mutually acceptable resolution) |
| 22 | [2014] FWC4476 (Costs application re [2014] FWC3288 | 1135 | Unclear | 7/7/14 | 1 | 1 | F  **Ms SW** | N | WA Govt | Y  WA govt | See next column | 3/6 and 13/6/14 written submissions  4/6 and 17/6/14 written subs | Multiple | Application for costs dismissed | **Application for costs in connection with an application** for an FWC order to stop bullying -substantive application dismissed on jurisdictional grounds—whether should have been reasonably apparent to applicant that application had no reasonable prospects of success -whether other grounds warrant a costs order—application for costs dismissed. [2014] FWC3288 (WA teacher case) WA Dept applied for costs immediately substantive decision issued by FWC [4] |
| 23 | [2014] FWC4497 | 19 | 16/5/14 | 7/7/14 | 1 | 1 | M  **GC** | N | Unknown | N | NA | NA | NA | Dismissed under s587(1)(a): Not made in accordance with Act (no fee, not proper form) | Not on prescribed form or with prescribed fee. FWC advises GC on 16/5/14 and 23/5/14 by letter but no further response from him. |

**Table S1.** *Cont.*

|  | **Case** | **AB No** | **App Date** | **Dec Date** | **Jn *** | **Heard By *** | **App Gender/Name** | **Legal Rep** | **Respondent** | **Legal Rep** | **Date of Response** | **Conf/Hearing Date** | **No of Bullies** | **Outcome** | **Comment** |
| --- | --- | --- | --- | --- | --- | --- | --- | --- | --- | --- | --- | --- | --- | --- | --- |
| 24 | [2014]  FWC4502 | 32 | 5/6/14 | 7/7/14 | 1 | 1 | M **AB** | N | Unknown | N | NA | NA | NA | Dismissed under s587(1)(a): Not made in accordance with Act (no fee, not  proper form) | Not on proper form and no fee paid. Advised by letter 5/6/14 and 12/6/14 but no further response from applicant |
| 25 | [2014]  FWC4666 | 1121 | 17/3/14 | 25/7/14 | 2 | 9 | M **Paul Hill** | N | LE Stewart PL t/a Southern Highlands Taxis & Coaches; Laurie Stewart; Robert Carnachan; Nick Matinca | N | Unclear | 3/4/14 telephone conciliation, unsuccessful. Hearing Wollongong 10/7/14. Directions hearing to assist [4]—no response  from app | 3 + (males) | Dismissed, failure to progress since 19/6/14 and no reasonable prospects—working relationship ended on 11/4/4. Respondents directed to file and serve submissions re costs by 1/8/14 and app in reply by 8/8/14 | Taxi driver—vituperative email exchanges to the OP and the FWC. App did not reply to FWC emails or calls from associate. Wife sends email to FWC to say husband not well and she wouldn’t let him work for people like this. FWC sent email about either discontinuing matter or adjourning hearing. No response from app. On 9/7/14 associate attempted contact, no response to call or email. Matter adjourned. 17/7/14 wife emails again, husband close to nervous breakdown—will not allow her husband to continue. Matter not discontinued despite assurances it would be. OP also got nasty. |
| 26 | [2014]  FWC4887 | 1113 | Unknown | **21/7/14** | **3** | 10 | M **Justin Corfield** | Unknown | Unknown | Unknown | Unknown | Unknown | Unknown | Not satisfied sufficient grounds to grant de-identification [34] | Application for de-identification of parties pursuant s593 (3) (c). Applicant opposed order; names of parties previously identified in daily hearing lists. 27 decisions of the FWC pursuant to s789FC, excluding 10 non-compliant, six of remaining de-identified [12] The **application of open justice** [22] |
| 27 | [2014]  FWC4895 | 36 | 18/6/14 | 22/7/14 | **1** | 1 | M **AG** | Unknown | Unknown | Unknown | Unknown | Unknown | Unknown | Dismissed under s587(1)(a) : Not made in accordance with Act (no fee) | No filing fee but did have a waiver form. On 19/6/14 FWC wrote to app requesting further info re waiver application, and on 26/6/14 advised waiver refused given circumstances and seeking payment of $65.50 fee. 3/7/14 FWC wrote again, no response and no fee payment. |
| 28 | [2014]  FWC4897 | 1302 | 18/6/14 | 28/7/14 | **1** | 1 | M **WM** | Unknown | Unknown | Unknown | Unknown | Unknown | Unknown | Dismissed under s587 (1) (a) and (c): insufficient detail and no reasonable prospect. | Incomplete form, 19/6/14 asked by FWC to complete, 26/76/14 telephoned and WM indicated did not wish to continue until he amended application in respect of contact details. FWC also wrote on same day to confirm requirement, and again on 30/6/14. WM did not contact FWC again or provide details. |
| 29 | [2014]  FWC5235 | 1054 |  | 4/8/14 | **3** | 11 | F **Paula Thomas** | Unknown | Unknown | Unknown | Unknown | Conference unsuccessful; hearing 6/5 and 5/6/14. Written closing submissions | Unknown | No reasonable prospect (as app) no longer employee for dismissed under s587 for WOJ | Ms Thomas no longer and employee: FWC advised at end of employer written submissions. So both invited by FWC to make submissions about whether FWC still has jurisdiction. App argued No support for bullied others still in workplace [6]. Respondent; no reason to set aside earlier FWC decisions. Order PR553832 will reflect dismissal of decision. |

**Table S1.** *Cont.*

|  | **Case** | **AB No** | **App  Date** | **Dec  Date** | **Jn *** | **Heard By *** | **App  Gender/ Name** | **Legal Rep** | **Respondent** | **Legal Rep** | **Date of Response** | **Conf/Hearing Date** | **No of Bullies** | **Outcome** | **Comment** |
| --- | --- | --- | --- | --- | --- | --- | --- | --- | --- | --- | --- | --- | --- | --- | --- |
| 30 | [2014]  FWC5588 | 1121 |  | 21/8/14 | 2 | 9 | M  Paul Hill | No | LE Stewart Investments PL T/A Southern Highlands Taxis & Coaches Anor | N | Unknown | NA. 29/7/14 Respondents final written submissions | 3 | Mr Hill ordered to pay $420.00 | [2014] FWC4666 (Paul Hill costs application).  Respondents filed submissions detailing  out-of-pocket (essentially) expenses, Hill no submissions. Mr Hill’s unreasonable behaviour [10] justifies exercise of discretion [11] |
| 31 | [2014]  FWC5926 | 1044 | Pre 5/3/14 [2] | 27/8/14 | **3** | 10 | F  **Tracey McGarrity** | No | Unknown | Unknown | Unknown | Conference 5/3/14. Recommendations including that when medically cleared, app and alleged bully participate in mediation | 1 | FWC rec mediation with B when OC medically cleared but OC resigned 15/8/14  FWC dismissed as no reason prospects s587(1) | Ms McGarrity resigned 15/8/14 |
| 32 | [2014] FWC6064 | 51 | 3/7/14 | 4/9/14 | **1** | 1 | F  **GW** | N | UNK | UNK | UNK | NA | UNK | Dismissed under s587(1)(a): insufficient detail and no fee. | No filing fee but waiver application, Form F72 incomplete. 3/7/14 FWC wrote and asked app to complete form, 4/7/14 advised waiver denied given circumstances, wrote again 11/7/14, no response from app |
| 33 | [2014]  FWC6065 | 68 | 19/7/14 | 4/09/14 | 1 | 1 | F  **SG** | N | UNK | UNK | UNK | NA | UNK | Dismissed under s587(1)(a) and (c): insufficient detail, has not advanced application, and no reasonable prospects. | Incomplete application including details of bullies; 21/7/14 FWC asked app to complete form. 22/7/14 app emailed FWC with apparent request for investigation by different body, FWC directed SG to file application with that body. 23/7/14 app called FWC and said she wanted to go with them and FWC again wrote to her on 28/7 requesting complete form. No further contact. |
| 34 | [2014]  FWC6066 | 73 | 23/7/14 | 4/9/14 | 1 | 1 | M  **WM** | N | UNK | UNK | UNK | NA | UNK | Dismissed under s587(1)(a) no fee and appropriate in all circumstances | Incomplete and no filing fee. 25/7/14 FWC wrote to WM, again on 1/8/14 but no response from WM |
| 35 | [2014]  FWC6067 | 82 | 4/8/14 | 4/9/14 | 1 | 1 | F  **CW** | N | UNK | UNK | UNK | NA | UNK | Dismissed under s587(1)(a) no fee and appropriate in all circumstances | FormF72 unsigned and no fee paid. 5/8/14and 12/8/14 FWC wrote to applicant. On further response from applicant |
| 36 | [2014]  FWC6128 | 1146 |  | 4/9/14 | 3 | 12 | F  **H** | No, but husband non-lawyer and  non-expert [3] but [20] professional | Centre and Others | Yes. JRM Tracey | UNK | Arbitration 10 and 11/9/14 | 2, T a  co-worker and I the centre director | Representation by lawyer allowed | Centre is a corporate entity providing services to community. No appropriate policies and procedures alleged in place or failed to follow. H off-work for some months. Six witnesses, interpreter for app. App’s husband opposed legal rep of R. |

**Table S1.** *Cont.*

|  | **Case** | **AB No** | **App Date** | **Dec Date** | **Jn *** | **Heard By *** | **App Gender/ Name** | **Legal Rep** | **Respondent** | **Legal Rep** | **Date of Response** | **Conf/Hearing Date** | **No of Bullies** | **Outcome** | **Comment** |
| --- | --- | --- | --- | --- | --- | --- | --- | --- | --- | --- | --- | --- | --- | --- | --- |
| 37 | [2014]  FWC6285 | 1136 | 24/3/14 | 31/10/14 | 2 | 13 | M  Applicant |  | Respondent | Y | Unk | Hearing 22,28/5/14, and 2/9/14. Final submissions 24/9/14 | 1, Mr PR | Application dismissed—not satisfied R or any of its officers have engaged in bullying the Applicant | Final hearing delayed due to applicant’s  ill-health, he is senior employee in Cth Dept in NSW office [4]. Details of PR’s alleged conduct at [4]. App ha previously made bullying allegations against supervisor, TM and on withdrawing was given new manager, Ms B. PIP instituted. |
| **38** | **ORDER** PR555329 (replaces doc issued 10/9/14 with same code) | 1052 | Unk | 15/9/14 | 2 | 13 | ?F  **Applicant** | Unk | Respondent | Unk | Unk | Further conference 3/7/14 | 1 (?male) | Order made | Details of order at A (6 points) and applicant shall not arrive at work before 8.15 am.  The employee, the subject of the application:  1. Shall not exercise on the balcony in front of, or in the vicinity of, the applicant’s desk between 8:15am and 4:15pm.  2. Shall not speak to the applicant in circumstances where there are no other individuals within listening-range.  3. Shall make no comment about the applicant’s attire or appearance.  4. Shall not send any emails to the applicant unless the substance of the correspondence is work-related and either Mr Hallam or Ms Scholes is also an addressee.  5. Shall not send any text messages or call the applicant on her personal telephone unless those messages are in relation to an immediate work-related emergency.  6. Shall not raise any issues relating to the applicant’s work capabilities or job performance without notifying Mr Hallam or Ms Scholes beforehand. |
| 39 | [2014]  FWC6555 | 87 | 11/8/14 | 19/9/14 | 1 | 1 | M **DM** | Unk | Unk | Unk | Unk | Unk | Unk | Dismissed under s587(1)(a) no fee and appropriate in all circumstances | No fee paid and form not signed. FWC advised DM by phone and letter on 11/8/14 of need for same. FWC contacted him again on 18/8/14 at which time DM indicated he may not continue and would contact FWC asap re same. Also sent letter. No further contact from DM |
| 40 | [2014]  FWC6563 | 101 | 18/8/14 | 19/9/14 | 1 | 1 | F **BW** | Unk | Unk | Unk | Unk | Unk | Unk | Dismissed under s587(1)(a) no fee and appropriate in all circumstances | Not completed on Form F72 and no fee. Contacted by phone and letter on 19/8/14. On 26/8/14 BW contacted FWC to advise that she is still preparing application on required form. FWC contacted by letter same day re fee. No further action or contact from BW. Nothing to stop her lodging application on correct form. |
| 41 | [2014]  FWC6723 | 1353 | 28/7/14 | 30/9/14 | 1 | 1 | M **AB** | N | NSW Dept. of Education | Y Mr Miles, Chief Legal Officer NSW Dept. | NSW raised jurisdictional objection | Conference not attended by AB | Unk | W/place not a constitutionally –covered w/place [19].Dismissed as no jurisdiction to hear or determine application…Even if bullying behaviour occurred at the NSW govt school it could not lead to a finding that AB bullied at work within the meaning of the FW Act.[23] | Application by teacher for an FWC order to stop bullying—workplace conducted by State government Dept under the terms of State legislation—scope of anti-bullying jurisdiction discussed—whether workplace is constitutionally-covered—not conducted by the Commonwealth or in a Territory—whether trading or financial corporation—not a corporation—no jurisdiction -application dismissed. 6/9/14 app contacted FWC to explain non-attendance at conference, indicated wanted to proceed, but no submissions about JO or further contact from AB. |
| 42 | [2014]  FWC6962 | 93 | 13/8/14 | 3/10/14 | 1 | 1 | F **LP** | Unk | Unk | Unk | Unk | Unk | Unk | Dismissed under s587(1)(a) no fee and appropriate in all circumstances | No on proper form and fee not paid. FWC contacted by letter on 22/8/14 and 29/8/14 but no further contact from LP |

**Table S1.** *Cont.*

|  | **Case** | **AB No** | **App Date** | **Dec Date** | **Jn *** | **Heard By *** | **App Gender/ Name** | **Legal Rep** | **Respondent** | **Legal Rep** | **Date of Response** | **Conf/ Hearing Date** | **No of Bullies** | **Outcome** | **Comment** |
| --- | --- | --- | --- | --- | --- | --- | --- | --- | --- | --- | --- | --- | --- | --- | --- |
| 43 | [2014]  FWC6964 | 107 | 22/8/14 | 3/10/14 | 1 | 1 | M **PT** | Unk | Unk | Unk | Unk | Unk | Unk | Dismissed under s587(1)(a) no fee and appropriate in all circumstances | Not on proper form and no fee paid. 22/8/14 PT advised by letter re same, again on 29/8/14. On 4/9/14 FWC sent email to PT. He indicated he may not continue as AB jurisdiction may not apply to his situation. Was directed to FWC website and **given contact information for community legal centre**. No further response from PT and fee not paid. |
| 44 | [2014]  FWC6967 | 1404 | 1/9/14 | 3/10/14 | 1 | 1 | F **BH** | Unk | Unk | Unk | Unk | Unk | Unk | Dismissed under s587(1)(a) no fee and appropriate in all circumstances | Fee not paid and proper form not used. BH contacted by letter on 2/9/14 and 9/9/14 and phoned same day. No further response from PT. |
| 45 | [2014]  FWC6988 | 1231 | Unk | 9/12/14 | 1 | 1 | GC | Y, and by S Miotti of Roman and Romans Lawyers and S Fisher of counsel in hearing [5] | Unknown (?SI) [15] | No, MH and MD (employer and MD shared rep without external rep). | Unk | Private hearing. Brisbane 2,3 and 24/10/14. | 1 × male senior manager | No basis to make the order as GC no longer at work, so application must be dismissed | Senior mgt employee alleging MD repeatedly behaved unreasonably—all parties seeking decision de-identify—hearings in private -request of parties accommodated—sale of applicant’s former business into larger undertaking and contract of employment formed—dispute about conduct—dispute as to whether contract document represented the terms of employment agreement—after hours work—changes in reporting arrangements—warning issued to applicant—lack of communication on certain matters—conversation at bar after work function—whether occurred at work—whether conduct represents repeatedly unreasonable behaviour—some behaviour not demonstrated on the evidence but certain unreasonable conduct found—not necessary to make finding as tow whether conduct was at work and created relevant risk to health and safety—no basis to make orders due to expiry of fixed term employment contract—absence of any context in which future risk might arise—observations made about problematic nature of orders given the particular context—application dismissed. Witnesses: 6 for R [29], 5 for A [19] No witnesses impartial (except psych) |
| 46 | [2014]  FWC7030 | 1293 | 12/6/14 |  | 4 | 4 | M Campbell Michael Prosser | Y, Mr J Da Silva, Aust. Meat Industry Employees Union | Chapman Road Enterprises PL T/A Glenfield IGA | Yes, George Raptis, Workplace Relations lawyer, Master Grocers Assoc. | Unk | 7/8/14 conference | Unk | Dismissed pursuant to s587(3)(a) (on its own initiative) for want of prosecution. | Bullying started May/June 13, last episode 5/2/14, not at work since 7/2/14, left early to attend appt. Employer says performance appraisal on 5/2/14. When asked why, app advised to make AB claim while still and employee. FWC advised at conference it would pend app for 2/12 and dismiss if no hearing request. No such request from application. |
| 47 | [2014]  FWC7326 | 1260  1261  1266 | 23/5/14 (SB, AC) 29/5/14 (SW) | 21/10/14 | 3 | 3 | 2F, 1M Sharon Bowker Annette Coombe Stephen Zwarts | ? | DP World Melbourne Ltd T/a DP World, Maritime Union of Aust, & Ors | ? | Unk | Unk | 25/8/14 brief directions hearing, stay app Hear 22/9/14 | Not satisfied that interests of justice served by making a stay order [22]. First week of scheduled hearings vacated as particular questions referred to the FB for determination | Application for stay, not granted. 10/2/14 MUA commenced FCA proceedings for adverse action, MUA delegate: *The Maritime Union of Australia & Anor v DP World Melbourne Limited—*VID 74/2014. 22/8/14 MUA wished certain threshold matters and juris. Objections determined [3]. FWC not persuaded to grant a stay. Credibility of Bowker [8] |

**Table S1.** *Cont.*

|  | **Case** | **AB No** | **App Date** | **Dec Date** | **Jn *** | **Heard By *** | **App Gender/ Name** | **Legal Rep** | **Respondent** | **Legal Rep** | **Date of Response** | **Conf/ Hearing  Date** | **No of Bullies** | **Outcome** | **Comment** |
| --- | --- | --- | --- | --- | --- | --- | --- | --- | --- | --- | --- | --- | --- | --- | --- |
| 48 | [2014]  FWC7378 | 1344 | Unk | 31/10/14 | 3 | 10 | F  Applicant | N | Unknown | ? Likely yes | Unknown | Written submissions | Unknown | Satisfied that there is complexity and the matter would be dealt with more efficiently if permission granted [27–28] | Application to be represented by a lawyer or paid agent. Employer: complex, number of witnesses (at least 8)to be called, may seek order to produce app’s medical records. One respondent employee sought to be represented. Applicant opposes. Declined to conciliate and insisted matter proceed directly to arbitration [18] |
| 49 | [2014]  FWC7381 | 1260  1261  1266 | 23/5/14  (SB, AC)  29/5/14  (SW) | 21/10/14 | 3 | 3 | 2F, 1M  Sharon Bowker  Annette Coombe  Stephen Zwarts | Unknown, likely yes | DP World Melbourne Ltd. T/a DP World, Maritime Union of Aust, & Ors | ? Likely yes | Unknown | Written submissions | Unknown | Not persuaded that the embarrassment and risk of prejudice outlined by the MUA outweigh the desirability for open justice in dealing with applications [17] | Application to de-identify party refused. [12] circumstances not unique. Five points raised [12–16] horse has bolted. Applications not joined but being dealt with by FWC concurrently. 23/9/15 MUA applied for orders under s593 and 594 to de-identify parties, and location of workplace, the industry, the persons against whom allegation made in any FWC decision [5] Referred to Justin Corfield decision [2014] FWC4887. Apps opposed order—want open hearing and open justice [10] |
| 50 | [2014]  FWC7421 | 79 | 31/7/14 | 21/10/14 | 1 | 1 | F  KS | Unknown | Unknown | Unknown | Unknown | Unknown | Unknown | Dismissed pursuant to s587(3)(a) and (c) as application contains insufficient detail for FWC to progress the matter, KS has not advanced application and no reasonable prospects of success [11]. | Proper form not used and no fee paid. 31/7/15 advised of requirements by letter. 31/8/14 KS paid fee but application still incomplete in important respects including details of persons cited as engaging in alleged bullying conduct. FWC sent further correspondence to KS re this, and telephone on 8/814. K could not confirm is she intended to proceed or discontinue [8]. No further response from KS. |
| 51 | [2014]  FWC7422 | 1393 | 26/8/14 | 21/10/14 | 1 | 1 | M  AN | Unknown | Unknown | Unknown | Unknown | Unknown | Unknown | Dismissed pursuant to s587(3)(a) as not made in accordance with the Act—not accompanied by prescribed fee. | No filing fee and no waiver application.27/8/14 contacted in writing by FWC, by phone on 3/9/14, AN did not confirm payment or confirm whether he wished to proceed. FWC wrote again on 3/9/14 advising application may be dismissed without further notice or hearing if payment not made within 14 days. No further action. |
| 52 | [2014] FWC7507 | 116 | Unknown.  ? after issue of letter at 22/8/14 confirming employment would end [8] | 28/10/14 | 3 | 3 | F  Dr Pushpa Ravi | Yes | Baker IDI Heart and Diabetes Institute Holdings T/a Baker IDI Heart and Diabetes Institute; Dr Anne Reutens | Yes | Unknown | Short telephone mention on 25/9/14 as apparent to FWC app would be dismissed before application could be heard and determined | 1 X F and ?unknown others | App can file fresh app if reemployed [14], satisfied no reasonable prospects of success and also satisfied that FWC should exercise discretion to dismiss for this reason. App to dismiss and Order to that effect PR556973 issued separately. | Employee dismissed on 30/9/14 after application lodged, so application to dismiss by R, no risk of continued bullying at work. FWC alerted parties to possible effect of termination on application alluding to decisions in Shaw and Haines and asked them to contact FWC by 2/10/14 and advise chambers of respective positions. Counsel for app asked for adjournment for 10/7 so app could consult her husband who was then travelling OS. R advised it would apply to have app struck out which it did on 6/10/14. FWC asked Dr Ravi to file submissions in opposition to the application. She did. Subs in reply filed 16/10/14. Adopted reasoning in Shaw re ‘no reasonable prospects of success [5]. Employment was grant-related and was always due to end on 30/9/14 when funding concluded. “Grant Specific Employment Agreement’ [7]. App argued she could be reemployed soon so risk of bullying continuing. To distinguish from Shaw. FWC: possibility of reemployment ‘falls within ‘the realm of speculation not fact [12] |

**Table S1.** *Cont.*

|  | **Case** | **AB No** | **App Date** | **Dec Date** | **Jn *** | **Hear By *** | **App Gender/Name** | **Legal Rep** | **Respondent** | **Legal Rep** | **Date of Response** | **Conf/Hearing Date** | **No of Bullies** | **Outcome** | **Comment** |
| --- | --- | --- | --- | --- | --- | --- | --- | --- | --- | --- | --- | --- | --- | --- | --- |
| 53 | [2014]  FWC7527 | 148 | 26/9/14 | 10/11/14 | 1 | 1 | F  NM | Unk | Unk | Unk | Unk | Unk | Unk | Dismissed under s587(1)(a) as app not made in accordance with Act | Incomplete application and not on prescribed form. 26/9/14 advised by FWC of defects by letter 26/9/14, also on 3/10/14, and she called same day seeking information on nature of AB jurisdiction and orders that can be made, particularly more information about potential jurisdictional hurdle—directed to website [7]. No further contact and fee not paid. |
| 54 | [2014]  FWC7834 | 1411 | 5/9/14 | 5/11/14 | 1 | 1 | F  SM | Unk | Unk | Unk | Unk | Listed for prelim proceedings by phone 13/10/14, neither SM nor anyone acting on her behalf contacted FWC or participated in conference—no reason given for same | Unk | Dismissed under s587(1)(c) as no reasonable prospects of success: app not advanced application or participated in proceedings that would permit the substance of the app to be determined [6] | After non-attendance at conference FWC made several attempts to contact SM—no success—directions issued 21/10/14 for SM to advise FWC by 31/10/14 of her intention to proceed with app by no later than 31/10/14 [3]. SM did not respond. |
| 55 | [2014]  FWC7923 | 30 | 3/6/14 | 18/11/14 | 3 | 15 | M  Peter Hankin | Y, by lawyer brother John Hankin (who had appeared before Lewin before) but L has no recollection of same | Plumbers Supplies  Co-operative Ltd. and others | Y,  Mr Forster,  Ms Stuckey-Clarke [48] | Unk | Telephone conference 28/7/14, face-to-face conciliation 7/8/14…others [12] hearing 8/10/14 (as per chronology provided by Rs). 15/10/14 directed R to file confirmation of w/o prejudice proposal made during hearing 15/10/14 | 6 males plus company named as respondents | [34–40] re the creation of jurisdiction and conferral and exercise of power under the AB jurisdiction.  Unauthorised and unofficial recording of 16/10/14 mention [44] by applicant  Alleged improper communication with R’s legal rep [48] professional misconduct in preparing ad filing witness statement [49]  Permission to appear concerns [57] order to produce [60].  Draft orders attached to applicant’s application | Recusal application for the FWC as presently constituted to recuse itself and stop dealing with his AB app on basis of actual and apprehended bias—dismissed. App filed submissions, as did Resp opposing recusal. App doesn’t make clear what grounds of bias app is alleging and Lewin unable to discern as basis on which it could be maintained he was biased [4]. Only knows of app through general protections app lodged at same time, no interest in outcome [6]. Claim FWC ‘inattentive, unsympathetic and disengaged from the proceedings and merits of the matter…appears to have prejudged certain issues in relation to its powers to make orders [10]. App had to file response to w/o proposal by 30/10/14 after a mention on 22/10/14. No complaint about procedure made til 30/10/14 [13]. App medically unfit for work since 29/4/14 [17,18]. Made original complaint of bullying? to employer At hearing proposal to transfer app to difference workplace [19] Independent external training to alleged perps [19], training of two in conducting workplace investigations. Applicant requested adjournment [19] R had sought on 8/10/14 to strike out application as vexatious because app demanded cash settlement of several hundred thousand dollars—alluded to “legal train wreck” if not settled [20]. Commission declined to strike out |

**Table S1.** *Cont.*

|  | **Case** | **AB No** | **App Date** | **Dec Date** | **Jn *** | **Heard By *** | **App Gender/ Name** | **Legal Rep** | **Respondent** | **Legal Rep** | **Date of Response** | **Conf/ Hearing Date** | **No of Bullies** | **Outcome** | **Comment** |
| --- | --- | --- | --- | --- | --- | --- | --- | --- | --- | --- | --- | --- | --- | --- | --- |
| 56 | [2014]  FWC7925 | 163 | 14/10/14 | 12/11/14 | 1 | 1 | M JS | Unknown | Unknown | Unknown | Unknown | Unknown | Unknown | Dismissed under s587(1)(a) as not made in accordance with Act noting nothing stops JS exercising his intent to lodge  a completed form. | Application not signed and not accompanied by requisite fee. 15/10/14 FWC to app letter, re same. JS contacted FWC that day to say he wanted to proceed and will sign app and pay fee. 22/10/14 further letter to JS. No further response. |
| 57 | [2014]  FWC8083 | 98 | Unknown | 17/11/14 | 4 | 19 | F Mrs Arpita David | Unknown | Unknown | Unknown | Unknown | Unknown | Unknown | Unknown | Applicant resigned from employment so FWC has no jurisdiction to deal with application and will issue an order to dismiss in conjunction with this decision, |
| 58 | [2014]  FWC8240 | 164 | 16/10/14 | 4/12/14 | 1 | 1 | F LH | Unknown | Unknown | Unknown | Unknown | Unknown | Unknown | Dismissed under s587(1)(a) as not made in accordance with Act | Application not on Form F72 and was in nature of complaint, did not contain sufficient information to enable matter to be assessed and no fee paid. FWC letter 17/10/14. 23/10/14 LH sent email re payment process. FWC immediately provided form, fee waiver form, and links to FWC info on the AB jurisdiction. 27/10/14 wrote again to applicant. No response |
| 59 | [2014]  FWC8402 | 30 | 3/6/14 | 1/12/14 | 3 | 15 | M  Peter Hankin | Y, by lawyer brother John Hankin (who had appeared before Lewin before) but L has no recollection of same | Plumbers Supplies  Co-operative Ltd. and others | Y, Mr Forster, Ms Stuckey-Clarke [48] | 3/10/14 application for confidentiality orders by R, App responded 7/10/14 | ? | 6 x males | In balancing the interests of open administration of justice against the embarrassment or perceived damage the Rs may suffer, I am not satisfied that it is desirable to make the confidentiality orders sought by the R—so refused [31] but doesn’t stop them reapplying as nature of evidence flowing form hearing of substantive issue becomes clearer | Application by respondent for confidentiality orders. Opposed by Applicant. Respondents not prevented from applying again for confidentiality orders as nature of evidence from hearing of substantive matter becomes clearer. No transcript of hearing unless FWC or parties order same, hearing conducted in private. R: A number of allegations about behaviour outside work, including criminal conduct [14] which could damage reputations. Hands up decision of Bissett in *Corfield*, only case of contested app for confidentiality order. FWC:balancing considerations and question of public justice—if evidence suggests unsubstantiated allegations potentially defamatory will reconsider. R pressed making of order [14]. ‘In written subs applicant wonders what general public would make of this sorry sage should it ever come to light—this comment followed an outrageous allegation by the app claiming that the conduct of the C in these proceedings has been designed to force the applicant to resign thus burying his application, so difficult to see how any reasonable person could interpret comment as anything other than threat to defame Commission in public (83–84). “As explained in Smidmore, mere embarrassment, distress or damage by publicity is not a sufficient basis to grant such an application” [25] |
| 60 | [201]  FWC8828 | 1169 | 9/4/14 |  | 3 | 8 | M  Dr Olusegun Victor Obatoki | N | Mallee Track Health & Community Services and Others | Yes (objected to by app) [6]  Ben Tallboys | 17/4/14 | 28/5/14 conference, mention and programming telecf.6/6/14  Juris hearing 23/7/14. | Mallee Track, CEO John Senior, DON Pamela Vallance | Dismissed s587(1)© no reasonable prospects on FWC’s own initiative as app no longer working (referring to Shaw decision0 | 11/8/14 FWC added another person, President of the Board, Keith Eckhardt. Following app request. Mediation between parties regarding contractual issues occurred earlier in year. 6/8/14 teleconference. Hearing 3/9/ and 15/10/14. R terminated service contract with Dove Investments 29/10/14 [9]. TC held 10/11/14 |

**Table S1.** *Cont.*

|  | **Case** | **AB No** | **App Date** | **Dec Date** | **Jn *** | **Heard By *** | **App Gender/Name** | **Legal Rep** | **Respondent** | **Legal Rep** | **Date of Response** | **Conf/ Hearing Date** | **No of Bullies** | **Outcome** | **Comment** |
| --- | --- | --- | --- | --- | --- | --- | --- | --- | --- | --- | --- | --- | --- | --- | --- |
| 61 | [2014]  FWC8905 | 1146 | 27/3/14 | 11/12/14 | 3 | 12 | F YH | No, husband. MS YH | Centre and Others | Y, Mr J Tracey (of Counsel) | Unknown | Unsuccessful council. Hearing 10,11,12/9/14, final written submissions received 21/10/14 | 2, Ms LI (Centre director) and Ms ET  (co-worker) | Cannot find Ms YH has been bullied at work.An order dismissing Ms YHs application is issued at the same time as this decision.  21 page decision | App is early childhood educator, R is small not-for-profit Incorp association, manager by director and committee mainly of parents. Mandarin interpreter provided for app. Six considerations arising out of Pat 6-4B. JO re whether constitutionally covered business withdrew when FWC alluded to McInnes case. ‘Unreasonable behaviour’ [13]-[15]. 6 witnesses [19]. Prefers evidence of Rs witnessed than Ms YH’s [29]. Change-table incident 4/214, app sick the next day. Meeting to discuss warning to app about lying about only one incidence of change table steps being left out scheduled for 7/2/14. Ms YH fell that morning and Ms LI called ambulance. Off work for 10/7, made WC claim. On 1st day back at work 17/2/14applied wrong sunscreen to child although child tried to tell her not to. App ill 18/2-16/3/14. After warning letter given app made bullying complaint about ET. YH evidence unclear, evasive or self-serving [44]. App appears to ha e led about 2nd warning letter being issued [52]. Ms YH is all probability, difficult to supervise and prone to avoid unpleasant or undesirable tasks [62] |
| 62 | [2014]  FWC9184 | 1052 | Unk | 16/12/14 | 2 | 13 | F Applicant |  |  |  |  | PR548852  PR555329 |  | On 21/3/14 following conference SDP Drake issued orders by consent. 10/9/14 following further conference amended orders issued. Revoked orders of 10/9/14 [5] | Correspondence from app following conference indicate negligible conflict…the past year of intervention from Fair Wok has been very positive and helpful. I think that the NY is an appropriate time to lift the orders and that it is in best interests of everyone involved to do so’ [4] |
| 63 | [2014]  FWC9444 | 1264 | 28/5/14 | 24/12/14 | 5 | 8 | M Gregory Haywood | Yes, David Lander. | Dept of the Environment & Ors | Yes, S Wright |  | 27/6, 28/8, 13/11 confs and further report back conference scheduled for 17/12/14 | A number of  co-workers | Dismissed s597(1)(c) no reasonable prospects | 12/12/14 R’s legal rep advised FWC by email that app’s employment terminated on 11/12/14 with immediate effect. FWC decided to proceed. Lander advised on morning of 17/1/214 that app unavailable due to previously made holiday arrangements, jurisdiction seems to have bene overtaken by the dismissal and the new general protections application [5]. No application to dismiss from app. |
| 64 | [2014]  FWCFB1440 | 1009 | 9/1/14 | 6/3/14 | 3 | 6,9,1 | F Kathleen McInnes | App assisted by Mr R Smith | Peninsula Support Services | J Dolan: ACTU; N Harrington of Counsel for R, B Ferguson for AI Group |  | 6/2/14 hearing |  |  | Jurisdictional issue referred to Full Bench and Cth, peak industry councils, ACCI, Ai Group, and ACTU invited to make submissions. Cth and ACCI made no [3]. **The legislative scheme not directed at punishing past bullying behaviour or compensating the victims of such behaviour. It is directed at stopping future bullying behaviour** [9]. |
| 65 | [2014]  FWCFB 9227 | 120  1261  1266 |  | 19/12/14 | 3 | 6, 9, 3, 1,5 | Sharon Bowker  *et al.* | M. Rinaldi and T Lange | DP World, MUA | R O’Neill for DP, R Clancy ACCI, D Miller AIG, Y Bakri MUA *etc.* |  | 20/11/14 hearing |  | Strike-out application dismissed. Remitted matter to DP Gostencnik. | The interpretation of the expression “bullied at work” is in contention in these proceedings [6] Peak bodies invited to make submissions on issue. “**While the worker is at work**” [19–28], [48] at work not limited to confines of a physical workplace; social media issues [54]. Section 577 |

**Table S1.** *Cont.*

|  | **Case** | **AB No** | **App Date** | **Dec Date** | **Jn *** | **Heard By *** | **App Gender/Name** | **Legal Rep** | **Respondent** | **Legal Rep** | **Date of Response** | **Conf/Hearing Date** | **No of Bullies** | **Outcome** | **Comment** |
| --- | --- | --- | --- | --- | --- | --- | --- | --- | --- | --- | --- | --- | --- | --- | --- |
| 66 | [2015]  FWC1 | 180 | 10/11/14 | 12/1/15 | 1 | 1 | F  LR | Unknown | Unknown | Unknown | Unknown | Unknown | Unknown | Dismissed s587(1)(a) not made in accordance with Act (no fee) | No filing fee. 11/11/14 FWC wrote to applicant, again 18/11/14, phoned 2/12/14 and directed to website. No further contact from app |
| 67 | [2015]  FWC2 | 178 | 6/11/14 | 12/1/15 | 1 | 1 | M  DG | Unknown | Unknown | Unknown | Unknown | Unknown | Unknown | Dismissed s587(1)(a) not made in accordance with Act (no fee) | Not on proper form and fee not paid. 6/11/14 letter to app, 13/11/14 letter and phone call. DG advised he may not continue as he in process of leaving workplace |
| 68 | [2015]  FWC402 | 1366 | 5/8/14 | 15/1/15 | 2 | 18 | M  Stephen Jackson | N | Armidale Club | N | Unknown | 9/9/14 tel conf with a, and another with Rs | 7 President, five board members and the bookkeeper | Dismissed for no reasonable prospects citing Shaw and will issue order to that effect | 11/12/14 email from R to FWC stating app employment terminated as at 27/11/14.16/12/14 email to parties. No response from app. |
| 69 | [2015]  FWC491 | 200 | 1/12/14 | 20/1/15 | 1 | 1 | F  SC | Unknown | Unknown | Unknown | Unknown | Unknown | Unknown | Dismissed s587(1)(a) not made in accordance with Act (no fee) | No filing fee. 2/12/14 SC phoned FWC and indicated may not proceed, would seek legal advice, and would contact FWC on 3/12/14. On 4/12/14 attempted to contact SC and sent letter. Another letter 11/12/14.No further contact from SC |
| 70 | [2015]  FWC494 | 1549 | 19/12/14 | 27/1/15 | 1 | 1 | F  EB | Unknown | Unknown | Unknown | Unknown | Unknown | Unknown | Dismissed s587(1)(a) not made in accordance with Act (no fee) | Form incomplete and no fee paid. Letter sent 22/12/14, 31/12/14. No further response form EB |
| 71 | [2015]  FWC496 | 212 | 16/1/214 | 27/1/15 | 1 | 1 | F  AS | Unknown | Unknown | Unknown | Unknown | Unknown | Unknown | Dismissed s587(1)(a) not made in accordance with Act (no fee) | Form accompanied by credit card details but payment could not be processed. Letter 17/12/14, 24/12/14, Attempted contact 7,15,19/1/15 for correct payment details. No response for AS. |
| 72 | [2015]FWC507 | 1532 | 2/12/14 | 27/1/15 | 1 | 1 | F  FC | Unknown | Unknown | Unknown | Unknown | Unknown | Unknown | Dismissed s587(1)(a) not made in accordance with Act (no fee) | Form F72 incomplete in important respects and no fee.2/12/14 letter to FC, also 9/12/14. Further attempts 15 ad 23/12/14. No response |
| 73 | [2015]  FWC508 | 183 | 11/11/14 | 20/1/15 | 1 | 1 | F  AC | Unknown | Unknown | Unknown | Unknown | Unknown | Unknown | Dismissed s587(1)(a) not made in accordance with Act (no fee) | Not completed on right form or accompanied by fee. 18/11/14 letter to AC, also 25/11/14, no further response. |

**Table S1.** *Cont.*

|  | **Case** | **AB No** | **App Date** | **Dec Date** | **Jn *** | **Heard By *** | **App Gender/ Name** | **Legal Rep** | **Respondent** | **Legal Rep** | **Date of Response** | **Conf/ Hearing Date** | **No of Bullies** | **Outcome** | **Comment** |
| --- | --- | --- | --- | --- | --- | --- | --- | --- | --- | --- | --- | --- | --- | --- | --- |
| 74 | [2015]  FWC562 | 1415 | 8/9/14 | 11/2/15 | 1 | 1 | M PK | Unknown | Unknown | Unknown | Unknown | 13/10/14 prelim tele conf. | 2 employees in relatively small restaurant | No reasonable prospect of an order being made given absence of discernible future risk of relevant bullying conduct. This means no reasonable prospects of success—as a matter of discretion should be dismissed and so orders | Termination letter 5/9/14 advising term would take effect 19/9/14. Lodged a general protections application at same time. Certificate issued in respect of GPA 17/11/14. R no case to answer as app no longer employee. FWC wrote to both parties. On 12/12/14 FWC contacted app who said that due to current financial situation would not be responding to the letter. Intended to take GPA to FCA and evident not discontinuing AB. |
| 75 | [2015]  FWC774 | 1324 | 3/7/14 | 13/2/15 | 2 | 9 | F  Amie Mac | A Tayler, solicitor | BOQ,  plus 5 ors | K Garner of counsel and AE Elliott solicitor | Unknown | 9 witnesses inc application  26–28/11/14 hearing | 5 | Not satisfied bullied at work so no power to make orders and application dismissed | De-identification application [6–9]. Ms Mac solicitor at BOQ and chartered accountant. |
| 76 | [2015]  FWC1131 | 1425 |  | 17/2/15 | 3 | 15 | M  James Willis | N | Marie Gibson, Capital Radiology Pty Ltd., Peita Carroll | Ms S McGowan, Service Industry Advisory Group | unknown | 2/12/14 hearing Melb | ?2 | 19/12/14 jurisdictional objection determined ex tempore | JO by R on basis app not bullied at work because actions management action, reasonable, carried out reasonably [9]. “In my view, a requirement for relevant management action to be reasonable is that there must be some line of cause and effect between conduct, behaviour or performance of an employee, and the relevant management action , and that the management action is a reasonable and proportionate response to the attributes of the employee to which it is directed” [12]. Conflation of performance management and discipline. Insufficient basis to commence disciplinary action, One person’s rudeness may be another person’s frankness [21] Management action will not be taken reasonably where it places an employee under pressure when the action is not commensurate with the behaviour that is the basis of the disciplinary action. |
| 77 | [2015]  FWC1740 | 120 | 18/1/15 | 16/3/15 | 1 | 1 | F AT | Unknown | Unknown | Unknown | Unknown | Unknown | Unknown | Dismissed s587(1)(a) not made in accordance with Act (no fee) | No filing fee, 20/1/15 letter to AT, 27/1/15 also. Call 10/2/15. No further response |
| 78 | [2015]  FWC1790 | 14 | 22/1/15 | 17/3/15 | 1 | 1 | M AA | Unknown | Unknown | Unknown | Unknown | Unknown | Unknown | Dismissed s587(1)(a) not made in accordance with Act (no fee) | Not on Form F72 and no fee paid. Letter to app 27/1/15, 6/2/15 and on 13/2 and 20/2/15 attempted calls. No further response form app |
| 79 | [2015]  FWC1999 | 170 |  | 26/3/15 | 3 | 21 | M  Mirceau Stancu | Unknown | AVI |  |  | Prelim conference by phone | Social, community, home care and disability services.  Ms Kiji Faktaufon, Country manager | Application lacks jurisdiction as app not working as a volunteer for a const. corp, applicant’s pace of work outside geographical reach of FW Act, behaviour of alleged bully was RMA in a RM | Various jo’s. App is volunteer with Australian Volunteers International, sanitation engineer, Kiribati. ?performs work for the ministry not AVI.  Insufficient connection to Aust [28] |

**Table S1.** *Cont.*

|  | **Case** | **AB No** | **App Date** | **Dec Date** | **Jn *** | **Heard By *** | **App Gender/ Name** | **Legal Rep** | **Respondent** | **Legal Rep** | **Date of Response** | **Conf/ Hearing Date** | **No of Bullies** | **Outcome** | **Comment** |
| --- | --- | --- | --- | --- | --- | --- | --- | --- | --- | --- | --- | --- | --- | --- | --- |
| 80 | [2015]  FWC2374 | 1531 |  | 29/4/15 | 2 | 13 | Unknown | Unknown | Unknown | Unknown | Unknown | Conferences and hearings conducted | Unknown | Recommendation  Disband Canteen Committee of Respondent P&C and others recs |  |
| 81 | [2015]  FWC2521 | 172 | 6/3/15 | 15/4/15 | 1 | 1 | F LF | Unknown | Unknown | Unknown | Unknown | Unknown | Unknown | Dismissed s587(1)(a) not made in accordance with Act (no fee) | Form F72 incomplete and no fee. 6/3/15 letter sent, also 11/3/15 and phone contact attempted 30/4/15. No response, no fee. |
| 82 | [2015]  FWC2733 | 136 | 9/10/14 | 22/4/15 | 2 | 14 | F  Estelle  Walker | Unknown | UWS and Ors | Unknown | Unknown | Unknown | 2 | Application cannot succeed in circumstances where the second of the two jurisdictional prerequisites of s789FF(1) cannot be met. No reasonable prospects so dismissed. | 26/2/15 USW applies to have matter dismissed as employment ceased 9/2/15 for redundancy.  Recent decision of Obatoki and Malee Health referred to [5] |
| 83 | [2015]  FWC2909 | 64 | 19/3/15 | 20/4/15 | 1 | 1 | GS | Unknown | Unknown | Unknown | Unknown | Unknown | Unknown | Dismissed s587(1)(a) not made in accordance with Act (no fee) | Not on prescribed form and no fee, 19/3/15 letter to app, 26/3/15 telephone call during which app indicated he would complete app on proper form, also wrote this day. 10/4/15 FWC attempted contact again, no further response |
| 84 | [2015]  FWC 2910 | 1260  1261  1266 |  | 28/4/15 | 3 | 3 | Bowker *et al.* | T Lange | DP World MUA | H Skene and E Hawthorne |  | 16/3/15 Melb hearing |  | Reasons. Request for order to produce premature. | Request to produce documents by applicant on 6/3/15, opposed by DP world |
| 85 | [2015]  FWC3353 | 1525 |  | 4/6/15 | 3 | 21 | AB | No | Salvation Army Employment Plus and Ors | Y, Mr Broadbent |  | Directions 27/2/, hearing 13/4/15 Melb | 2, Mr AC and Ms AD | Action was RMA undertaken in a RM and not satisfied behaviour created risk to health and safety. As not satisfied worker bullied at work, app dismissed. | Case worker employment consultant at Salvation Army (Vic). Determined names of individual parties would be confidential [8]. Respondent raised  jo—conduct was RMA undertaken in a RM—“rainbow caseload” |
| 86 | [2015]  FWC3515 | 1444 | 1/10/14 | 5/6/15 | 1 | 1 | M  Richard Bassanese |  | HPS Transport PL |  |  | 26/3/15 prelim conf |  | Dismissed application—not employed at time of application, no risk of further bullying | 29/9/14 termination letter (redundancy). Lodged UFD at same time as AB.  Dismissal found unfair, compensation 18/3/15 but no reinstatement. |
| 87 | [2015]  FWC 3538 | 1425 |  | 22/5/15 | 3 | 15 | M  James Willis | N | Marie Gibson, Capital Radiology Pty Ltd., Peita Carroll | Ms S McGowan, Service Industry Advisory Group |  | 30/3/15 hearing |  | FWC issued draft agreement [26] not agreed on by parties [27], Revised agreement issued 7/4/15, but this not agreed [29]. No power to make orders [35] | Unreasonable to Ms Gibson, GM and Ms Carroll to arrive unannounced and berate A about things which were in some if not most cases a consequence of him being new [11]—surprised by a joint visit and subject to sever criticism = UMA in UM [13]…it does not require the wisdom of ancients… “Risk’ defined [24] |

**Table S1.** *Cont.*

|  | **Case** | **AB No** | **App Date** | **Dec Date** | **Jn *** | **Heard By *** | **App Gender/ Name** | **Legal Rep** | **Respondent** | **Legal Rep** | **Date of Response** | **Conf/Hearing Date** | **No of Bullies** | **Outcome** | **Comment** |
| --- | --- | --- | --- | --- | --- | --- | --- | --- | --- | --- | --- | --- | --- | --- | --- |
| 88 | [2015]  FWC3604 | 114 |  | 22/5/15 | 3 | 10 | M  Mohamed Aly |  | Cth Bank, Michelle Gentile, Russell Hayman |  |  | 30/5/15 issued direction for the hearing of app |  | Permission for the Rs to have representation granted | Lawyer or paid agent representation and JO that conduct was RMA conducted in a RM. Not a JO in the strict sense—the app has made a proper app in that he reasonably believes he has been BAW. Whether he has is a matter for determination [12] |
| 89 | [2015]  FWC4203 | 358 | 13/5/15 | 24/6/15 | 1 | 1 | F GP | Unknown | Unknown | Unknown | Unknown | Unknown | Unknown | Dismissed s587(1)(a) not made in accordance with Act  (no fee) | Application not accompanied by fee. Letter sent 14/515. 21/5/15 attempted contact and wrote again. GP contacted later that day. 4/6/15 attempted further contact, no further response. |
| 90 | [2015]  FWC4410 | 94 | 14/4/15 | 30/6/15 | 1 | 1 | F SW | Unknown | Unknown | Unknown | Unknown | Unknown | Unknown | Dismissed s587(1)(a) not made in accordance with Act (no fee) | Form F72 not accompanied by filing fee. Letter sent 21/4/15, and SW contacted by phone 24/4/15 and advised that if fee not paid or waiver form not completed application could not be progressed, Sent further information about the process. 30/4/15 further letter and contact attempt, also on 7/5 and 14/5/15. No further response, fee not paid and no further action |
| 91 | [2015]  FWC6556 | 160 | 25/2/15 | 23/9/15 | 7 | 16 | F  Mrs Rachael  Roberts | N | View Launceston P/L T/A View Launceston  Ms Lisa Bird  Mr James Bird | Mr D Durkin for VIEW ad others | 5/3/15 from VIEW; from the Birds on 6/3/15 | 22-24/6/15 hearing set aside as app had jury duty. Re-listed for  27–29/7/15 in Launceston.  Bullying being found and also ongoing risk, matter listed for conference for parties to discuss order [123]. | 2 Lisa and James Bird, husband and wife |  | Real estate agent alleged 18 instances [3]. As A-B policy and reference manual [15] had been put in place R argued no need for FWC orders [3] making of orders under 789FF opposed. App evidence from postal worker and also from a director/comp. secretary of VIEW. R gave evidence and another person, Claxton, on their behalf. All  X-examined. Claxton’s evidence unsatisfactory in a number of respects [8], ditto Lisa Bird [20]. App made WC claim. Allegation 1 made out [20]. Obiter comment that employer has obligation to provide a safe work environment for all staff…action to make air temp comfortable in workplace to benefit of all employees should be a priority for VIEW[25]. Ms Bird’s actions in not processing silent listing sheet for 9 days unreasonable [33] and not following usual procedure; allegation 4 made out [35] Allegation 5 about Mrs Bird being rude about telephone answering made out [39]. Allegation 10 about Mrs Bird placing Mr Brass with collection agency unreasonable and designed to damage the relationship between App and client [59]. Allegation 12 about Ms Bird not greeting app in morning and not distributing her photocopying made out [63], Allegation 13 ignored in office, spoke to at times abruptly, generally treated app differently made out—email support that App was “in the gun’[65]. Allegation 13 A re inappropriate comments of a sexual nature implying relationship with lesbian client made out [69]. Belittling attitude and unreasonable comments to app “I don’t have to answer to you Rachael”—allegation 15, made out [77] “Naughty little school girl running to the teacher”, pointed at her, told her to sit down. Deleted as Facebook friend [87] .Mrs Bird’s actions evince a lack of emotional maturity and is indicative of unreasonable behaviour provocative and disobliging [89] Allegation 17 made out. Refers to decision in Re SB [2014] FWC 2104 at [41] and [43]. Mac case **[98] and bullying behaviour**. [118] App subjected to unreasonable behaviour from Mrs B 8 times [121] yes, it is bullying. Still a risk of ongoing bullying [122.] |
| 92 | PR54482 | 1052 | - | 21/3/14 | 2 | 13 | Applicant |  | Respondent |  |  |  |  |  | Order re exercise time *etc.* |
| 93 | PR550413 | 1091 | - | 95/14 | 3 | 3 | Mitchell Shaw |  | ANZ and Haines |  |  |  |  |  | Order to dismiss application lodged by Shaw |

**Table S1.** *Cont.*

|  | **Case** | **AB No** | **App Date** | **Dec Date** | **Jn *** | **Heard By *** | **App Gender/ Name** | **Legal Rep** | **Respondent** | **Legal Rep** | **Date of Response** | **Conf/ Hearing Date** | **No of Bullies** | **Outcome** | **Comment** |
| --- | --- | --- | --- | --- | --- | --- | --- | --- | --- | --- | --- | --- | --- | --- | --- |
| 94 | PR552280 | 1020 |  | 21/6/14 | 3 | 5 | Mr MT |  |  |  |  |  |  |  | Further to FWC decision of 23/6/14 application lodged 16/1/14 dismissed |
| 95 | PR552345 | 1093 |  | 24/6/14 | 4 | 4 | F  Natalie Brenton |  |  |  |  |  |  |  | In accordance with FWC decision 24/6/14 application dismissed pursuant to s587(3)(a) of FW Act |
| 96 | PR553843 | 1054 |  | 4/8/14 | 3 | 11 | F  Paula Thomas |  |  |  |  |  |  |  | In accordance with FWC decision 24/6/14 application dismissed pursuant to s587(3)(a) of FW Act |
| 97 | PR554588 |  |  | 21/8/14 | 2 | 9 | Paul Hill |  | LE Stewart T/a Southern Highlands tax *et al.* |  |  |  |  | Costs Order for $420 payable to LE Stewart Investments PL within  14 days of order date |  |
| 98 | PR554779 | 1044 |  | 27/8/14 | 3 | 10 | Tracey McGarrity |  |  |  |  |  |  |  | In accordance with FWC decision 27/8/14 application dismissed |
| 99 | PR555299 | 1146 |  | 10/9/14 | 3 | 12 | H |  | Centre and Others |  |  |  |  | Confidentiality order and terms of same | Application for order to stop bullying and for confidentiality order |
| 100 | PR55329 | 1052 |  | 10/9/14 | 2 | 13 | Applicant |  | Respondent |  |  |  |  | Order re exercise | Replacement/reissued order |
| 101 | PR556308 | 1293 |  | 10/10/14 | 4 | 4 | Campbell Michael Prosser |  |  |  |  |  |  |  | In accordance with FWC decision 10/8//14 application dismissed pursuant to s587(3)(a) |

**Table S1.** *Cont.*

|  | **Case** | **AB No** | **App Date** | **Dec Date** | **Jn *** | **Heard By *** | **App  Gender/ Name** | **Legal Rep** | **Respondent** | **Legal Rep** | **Date of Response** | **Conf/ Hearing Date** | **No of Bullies** | **Outcome** | **Comment** |
| --- | --- | --- | --- | --- | --- | --- | --- | --- | --- | --- | --- | --- | --- | --- | --- |
| 102 | PR556973 | 116 |  | 28/10/14 | 3 | 3 | Dr Pushpa Ravi |  | Baker IDI |  |  |  |  |  | In accordance with FWC decision 28/10/14 application dismissed |
| 103 | PR557364 | 1340 | 16/7/14 | 4/11/14 | 4 | 4 | Applicant |  |  |  |  |  |  | Terms of order at [5], includes foe 6/11/14 hearing to be conducted in private | Publication and disclosure prohibited |
| 104 | PR557710 | 1399 |  | 13/11/14 | 3 | 20 | F  Rita Ghosh |  |  |  |  |  |  | Application for interim order dismissed as FWC no longer has jurisdiction to deal with application |  |
| 105 | PR557727 | 98 |  | 17/11/14 | 4 | 19 | F  Arpita David |  |  |  |  |  |  |  | In accordance with FWC decision 17/12/14 application dismissed for want of jurisdiction |
| 106 | PR558708 | 1169 |  | 5/12/14 | 3 | 8 | Olusegan Obatoki |  | Mallee Track |  |  |  |  |  | In accordance with FWC decision5/12/14 application dismissed |
| 107 | PR558906 | 1146 | 27/3/14 | 11/12/14 | 3 | 12 | YH |  | Centre and Others |  |  |  |  |  | In accordance with FWC decision 11/12/14 application dismissed |
| 108 | PR559577 | 1264 | 28/5/14 | 24/12/14 | 5 | 8 | Gregory Haywood |  | Dept Environment and others |  |  |  |  |  | In accordance with FWC decision 24/12/14 application dismissed |
| 109 | PR560131 | 1366 | 5/8/14 | 15/1/15 | 2 | 18 | Stephen Jackson |  |  |  |  |  |  |  | In accordance with FWC decision 15/1/15 application dismissed |
| 110 | PR56242 | 1428 | - | 27/5/15 | 1 | 17 | F  Judy Hardinge |  |  |  |  |  |  |  | No contact for some months so dismissed in accordance  with s587 |
| 111 | PR567535 | 160 | - | 19/5/15 | 6 | 16 | Rachael Roberts |  | VIEW and Birds |  |  |  |  |  | Directions to lodge outline of submissions by 1/6/15 etc. |
| 112 | PR567824 | 232 | 17/4/15 | 27/5/15 | 4 | 4 | M  Andrew Gilbert |  | St John Ambulance WA |  | 28/4/15 | Conf scheduled 27/5/15. Rep of SJAA attended but not app |  |  | Alleged to have bullied SJAA volunteers and stood down from employment while matter investigated. On material provided to FWC satisfied AB not the appropriate means to resolve workplace conflict. Due to this and applicant’s lack of pursuing app satisfied no reasonable prospects of success and so advises parties. |

**KEY**

| **Jurisdiction** | | **Heard By** | | **Heard By** | |
| --- | --- | --- | --- | --- | --- |
| 1 | Adelaide | 1 | Commissioner Hampton | 14 | VP Catanzariti |
| 2 | Sydney | 2 | VP Watson | 15 | Commissioner Lewin |
| 3 | Melbourne | 3 | Deputy President Gostencnik | 16 | Deputy President Wells |
| 4 | Perth | 4 | Commissioner Cloghan | 17 | Deputy President Bartel |
| 5 | Canberra | 5 | Commissioner Johns | 18 | SDP Hamberger |
| 6 | Hobart | 6 | Justice Ross | 19 | Commissioner Williams |
| 7 | Launceston | 7 | Commissioner Roe | 20 | Commissioner Blair |
| **Abbreviations** |  | 8 | DP Kovacic | 21 | Commissioner Lee |
| RMA | Reasonable Management Action | 9 | VP Hatcher |  |  |
| RM | Reasonable Manner | 10 | Commissioner Bissett |  |  |
| Jn | Jurisdiction | 11 | Commissioner Cribb |  |  |
| JO | Jurisdictional objection | 12 | Commissioner Wilson |  |  |
| Conf | Conference | 13 | SDP Drake |  |  |
